# Supplementary material
Source: PubMed Central journal article supplement (PMC3410935)

## Supplementary Appendix

This appendix has been provided by the authors to give readers additional information about their work.

Supplement to: Coulibaly YI, Dembele B, Diallo AA, et al. A randomized trial of doxycycline for *Mansonella perstans* infection. N Engl J Med 2009;361:1448-58.

Supplemental Table 1. Frequency of adverse events

| Adverse event*   | No Rx<br>(n=110) | Doxy<br>(n=106) | Difference in percent (95%<br>CI) |
|------------------|------------------|-----------------|-----------------------------------|
| Dehydration      | 0                | 0               | 0% (-3.8%, 3.5%)                  |
| Diarrhea         | 28 (25.5%)       | 25 (23.6%)      | 1.9% (-10.1%, 13.5%)              |
| Fever**          | 21 (19.1%)       | 10 (9.4%)       | 9.7% (0.3%, 19.3%)†               |
| Headache         | 31 (28.2%)       | 35 (33.0%)      | -4.8% (-17.4%, 7.6%)              |
| Jaundice         | 0                | 0               | 0% (-3.8%, 3.5%)                  |
| Lymphangitis     | 0                | 1 (0.9%)        | -0.9% (-5.7%, 2.6%)               |
| Pruritus         | 8 (7.3%)         | 12 (11.3%)      | -4.0% (-12.5%, 4.3%)              |
| Rash             | 3 (2.7%)         | 1 (0.9%)        | 1.8% (-2.9%, 7.0%)                |
| Respiratory Sxs  | 13 (11.8%)       | 12 (11.3%)      | 0.5% (-8.7%, 9.6%)                |
| Vomiting         | 4 (3.6%)         | 18 (17.0%)      | -13.3% (-22.2%, -5.6%)†           |
| T $\geq$ 38.0°C  | 4 (3.6%)         | 4 (3.8%)        | -0.1% (-6.5%, 6.2%)               |
| Hgb < 10 g/dL    | 0                | 0               | 0% (-3.8%, 3.5%)                  |
| ALT >45 U/L      | 0                | 2 (1.9%)        | -1.9% (-7.1%, 1.5%)               |
| Bili > 1.5 mg/dL | 32 (29.1%)       | 13 (12.3%)      | 16.8% (6.1%, 27.5%)†              |
| Cr >1.4 mg/dL    | 0                | 0               | 0% (-3.8%, 3.5%)                  |

\* each subject was counted only once for each adverse event

\*\*by subject report in the preceding 24 hours

† p<0.05

Supplemental Table 2. Severity and duration of adverse events in subjects receiving doxycycline.

| Adverse event    | Grade 1*<br>(no.) | Grade 2*<br>(no.) | Median Duration, Range<br>(days) |
|------------------|-------------------|-------------------|----------------------------------|
| Diarrhea         | 24                | 1                 | 1, 1-3                           |
| Fever            | 10                | 0                 | 1, 1-3                           |
| Headache         | 24                | 11                | 1, 1-2                           |
| Lymphangitis     | 1                 | 0                 | 1                                |
| Pruritus         | 9                 | 3                 | 1, 1-3                           |
| Rash             | 0                 | 1                 | 27                               |
| Respiratory Sxs  | 5                 | 7                 | 1                                |
| Vomiting         | 17                | 1                 | 1, 1-5                           |
| T $\geq$ 38.0°C  | 3                 | 1                 | 1                                |
| ALT >45 U/L      | 2                 | 0                 | See below**                      |
| Bili > 1.5 mg/dL | 9                 | 4                 | See below**                      |

\* Adverse events were graded according to the NCI CTC Toxicity Scale version 2.0, which ranges from 1-5 with 5 being the most severe. No grade 3 or 4 adverse events were reported.

\*\* Bilirubin and ALT were measured at baseline, 21 days, 42 days, at 6, 12 and 36 months. Elevated ALT resolved in both subjects by 6 months. Bilirubin elevations resolved within 21 days in 4 subjects, within 42 days in 2 subjects, and within 6 months in 5 subjects. Two subjects, one of whom had a mild elevation of bilirubin at baseline (1.67 mg/dl), still had elevated levels at 6 months (< 3 mg/dl). Both resolved by the end of the study.

Supplemental Table 3. Efficacy of doxycycline with and without albendazole/ivermectin in reducing Mp and Wb microfilarial levels

|              | Median Mp mf/ml              |                            |                             |                          | Median Wb mf/ml*            |                          |                           |                     | Geometric Mean Wb CAg level**   |                                  |                           |
|--------------|------------------------------|----------------------------|-----------------------------|--------------------------|-----------------------------|--------------------------|---------------------------|---------------------|---------------------------------|----------------------------------|---------------------------|
|              | (range)                      |                            |                             |                          | (range)                     |                          |                           |                     | (range)                         |                                  |                           |
|              | Baseline                     | 6 mo                       | 12 mo                       | 36 mo†                   | Baseline                    | 6 mo                     | 12 mo                     | 36 mo†              | Baseline                        | 6 mo                             | 12 mo                     |
| None         | 323<br>(17-20,128)<br>n = 75 | 136<br>(0-5,916)<br>n = 67 | 153<br>(0-11,441)<br>n = 63 | 264<br>(0-8,305)<br>n=64 | 187<br>(17-6,222)<br>n = 13 | 68<br>(0-1547)<br>n=11   | 179<br>(0-3056)<br>n = 10 | 0<br>(0-44)<br>n=9  | 1298<br>(135-14,418)<br>n = 23  | 1403<br>(21-2,380,780)<br>n = 20 | 377<br>(9-4,315)<br>n=17  |
| Doxy         | 357<br>(17-5,712)<br>n = 76  | 51<br>(0-1,955)<br>n = 67  | 0<br>(0-17)<br>n = 69       | 0<br>(0-383)<br>n=64     | 595<br>(17-3,196)<br>n = 11 | 0<br>(0-187)<br>n = 11   | 0<br>(0)<br>n = 11        | 0<br>(0-29)<br>n=11 | 1739<br>(113-34,153)<br>n = 25  | 772<br>(26-101,600)<br>n = 19    | 679<br>(95-7,065)<br>n=18 |
| Doxy +<br>AI | 332<br>(17-8,313)<br>n = 30  | 51<br>(0-3,315)<br>n = 26  | 0<br>(0)<br>n = 25          | 0<br>(0-102)<br>n=23     | 85<br>(17-8,857)<br>n = 11  | 0<br>(0)<br>n = 10       | 0<br>(0)<br>n = 10        | 0<br>(0-900)<br>n=8 | 1743<br>(155-146,305)<br>n = 21 | 738<br>(17-124,188)<br>n = 17    | 277<br>(31-3,358)<br>n=15 |
| AI           | 340<br>(17-6,120)<br>n = 35  | 102<br>(0-2,108)<br>n = 31 | 153<br>(0-799)<br>n = 27    | 102<br>(0-3,783)<br>n=29 | 51<br>(17-5,134)<br>n = 11  | 68<br>(0-4,539)<br>n = 9 | 17<br>(0-1,224)<br>n = 7  | 0<br>(0)<br>n=8     | 1214<br>(133-61,299)<br>n = 22  | 501<br>(8-79,640)<br>n = 15      | 436<br>(17-4,630)<br>n=16 |

\*subjects without detectable Wb microfilariae at baseline have been excluded from analysis

\*\*subjects with negative circulating antigen at baseline have been excluded from analysis

† all subjects received single dose albendazole/ivermectin as part of the mass distribution program prior to the month 36 visit

Supplemental Figure 1. Flow chart of study participants. A) Treatment and analysis of Wb-Mp+ subjects and B) Treatment and analysis of Wb+Mp+ subjects. \*Although 40 subjects were anticipated in each of the Wb-Mp+ subgroups, the initial allocation was based on ICT card test results. Five subjects classified as Wb+ by ICT were found to be Wb- by ELISA prior to the initiation of doxycycline therapy and were reallocated to the corresponding Wb-Mp+ treatment group.

A

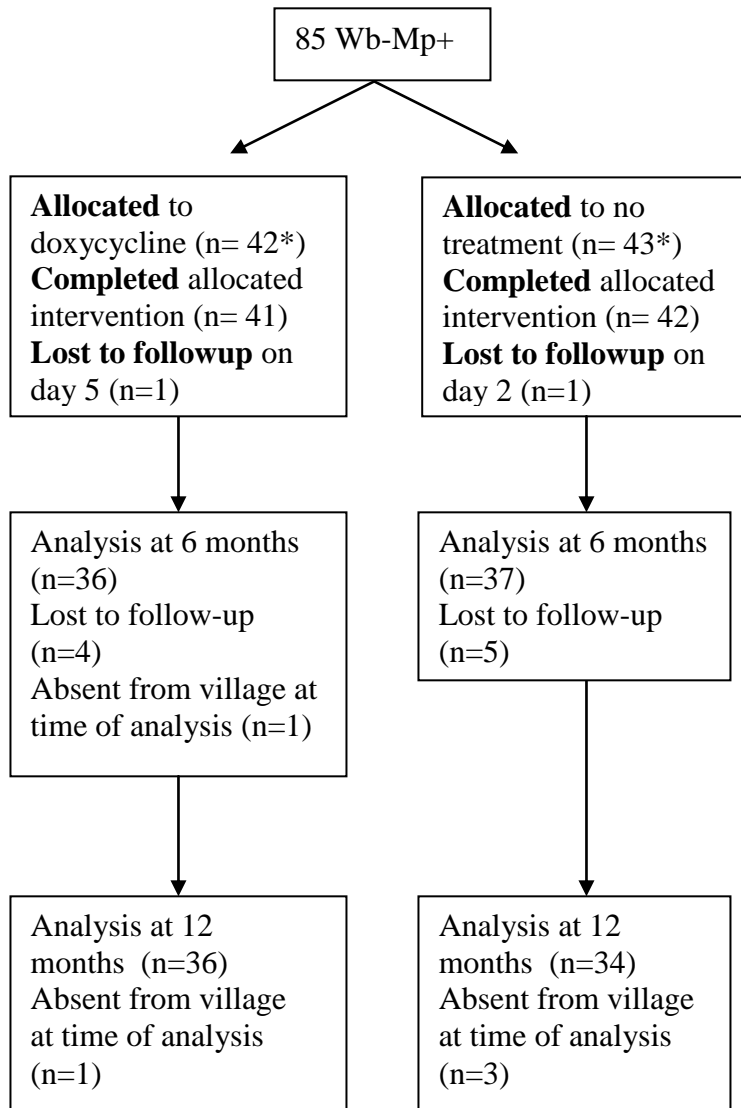

**B**

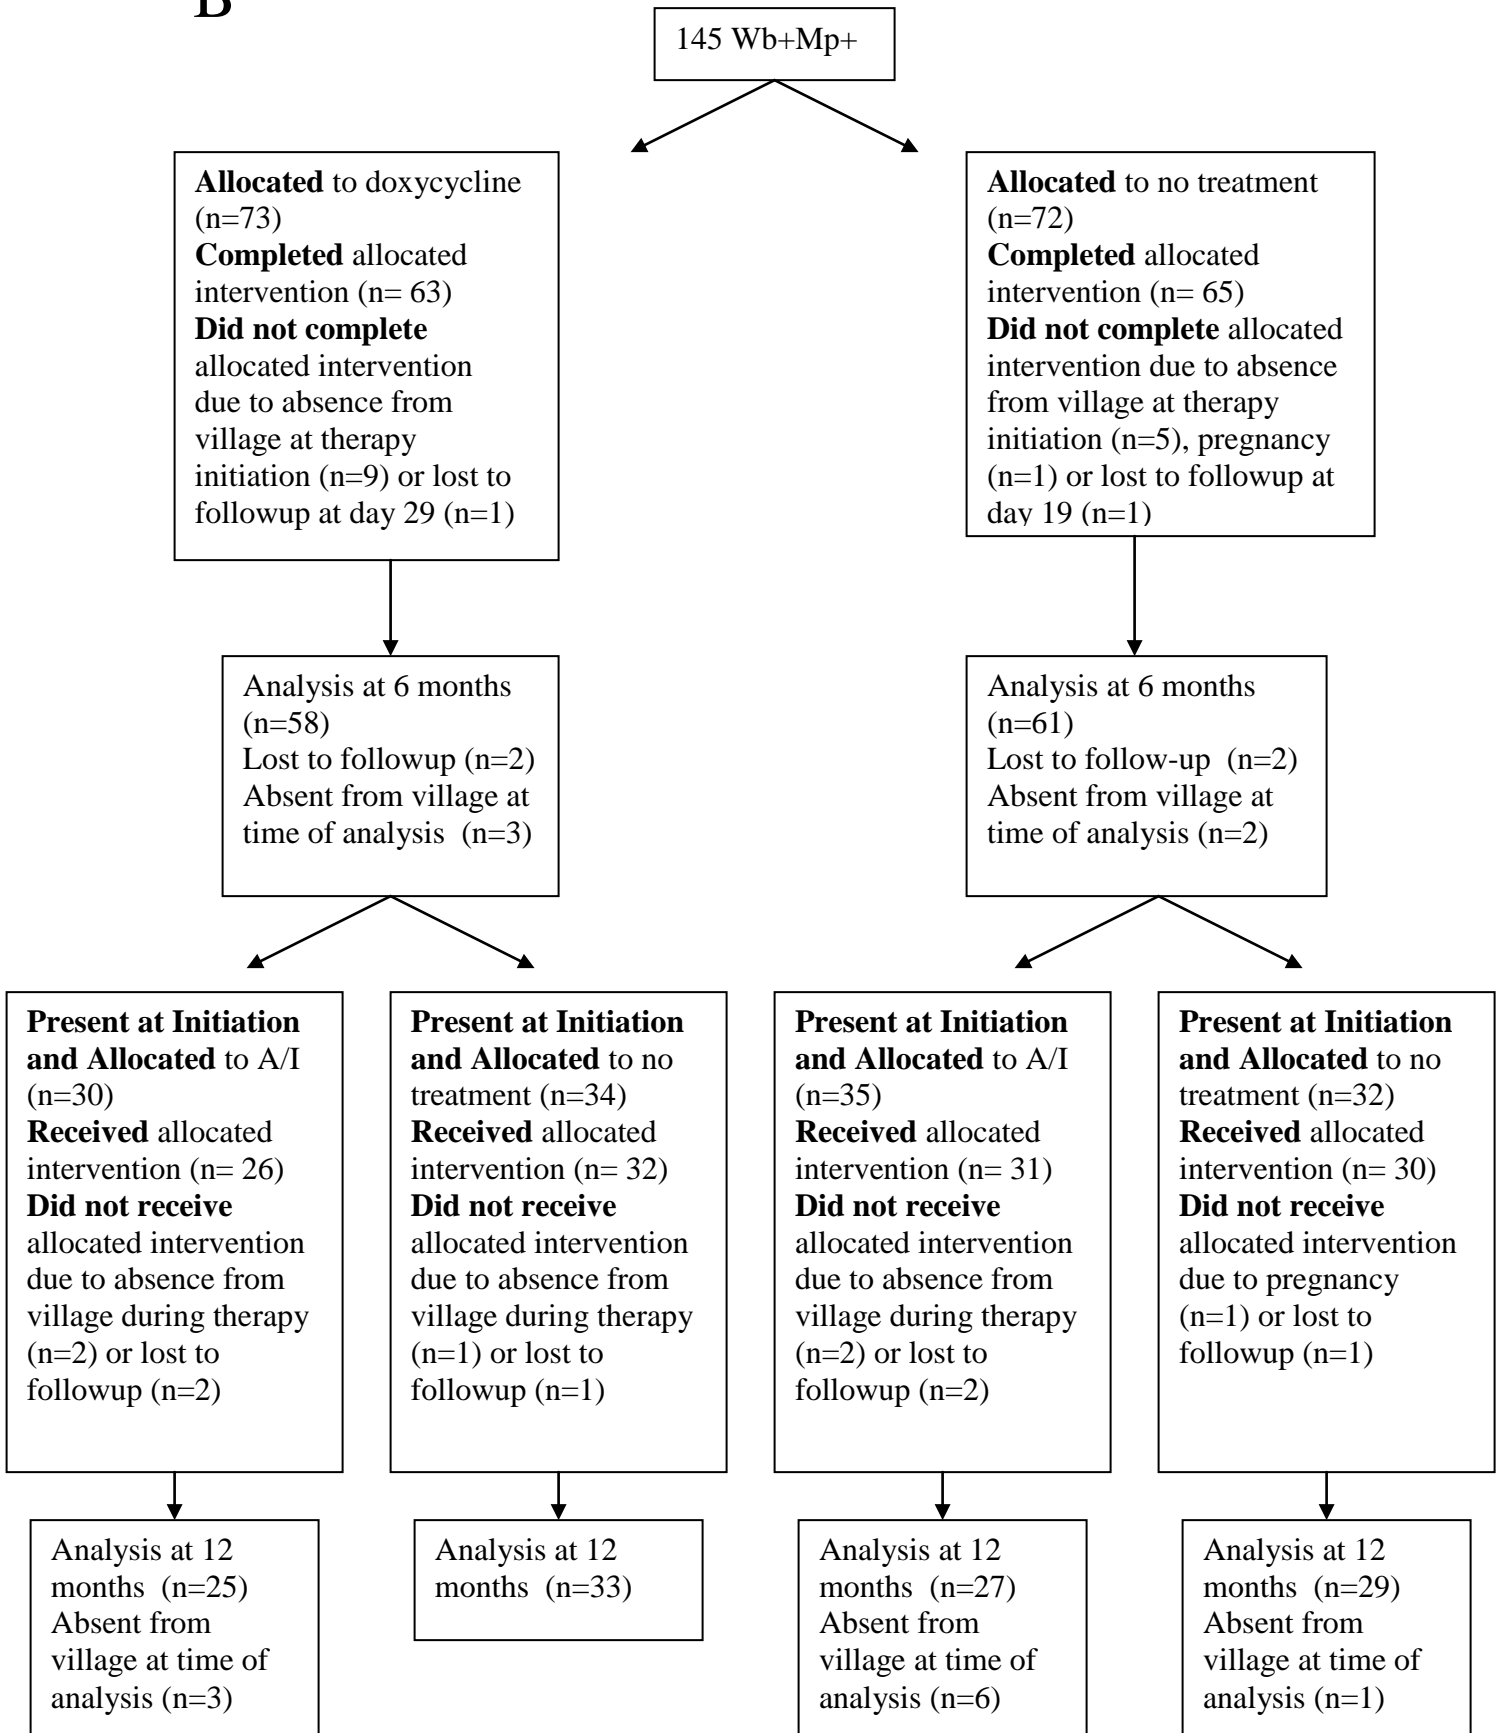

Supplement: NIHMS390886-supplement-Online_supplement.pdf [file NIHMS390886-supplement-Online_supplement.pdf]
